# Supplementary material
Source: publisher figshare collection journal article supplement (https://tandf.figshare.com/ndownloader/files/17810324)
Supplement: Supplementary file 1 [file 17810324]

Table S1. Cross sectional diagrams illustrating alternative sites for stream gauge location

| **Stream** | **Station name** | **Code** | **Cross-Section** | | **Coordinates (WGS84)** | |
| --- | --- | --- | --- | --- | --- | --- |
| **Lon** | **Lat** |
| **Combeima River** | Juntas | C1 | 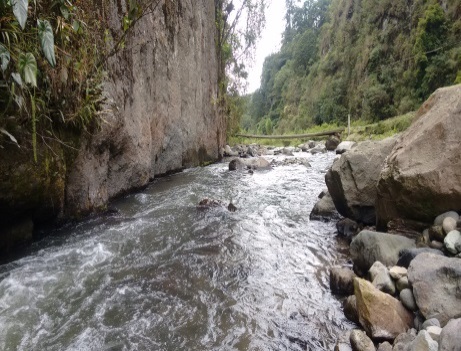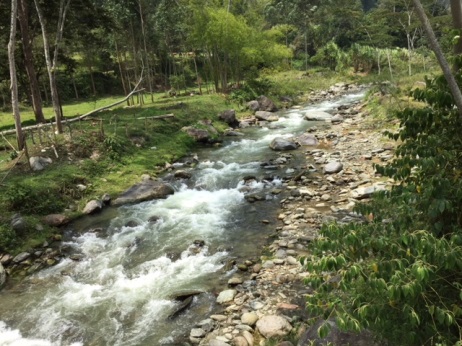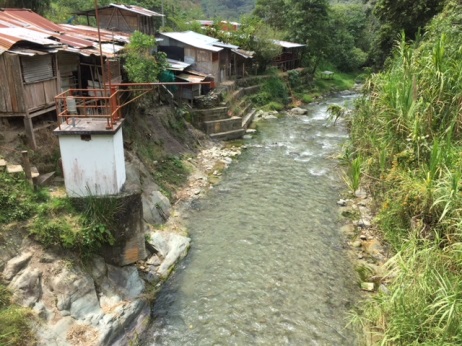 |  | -75.32123482 | 4.559021978 |
| **Combeima River** | Pastales | C2 |  | |  | | --- | | -75.29945305 | 4.508574932 |
| **Combeima River** | Montezuma | C3 |  |  | -75.28677095 | 4.482263684 |
| **Combeima River** | Libertador | C4 | 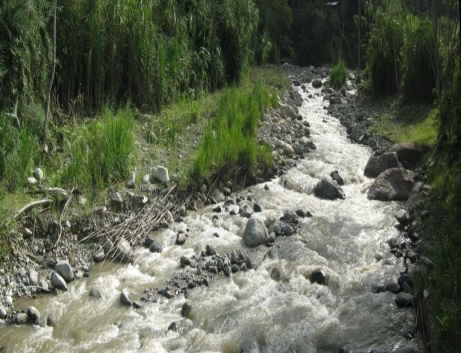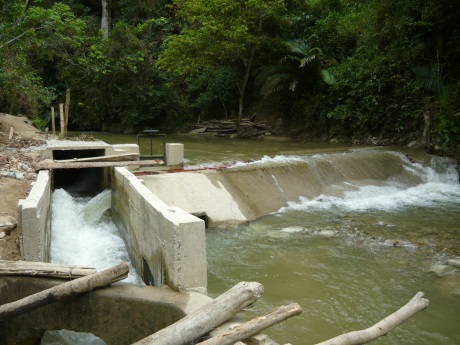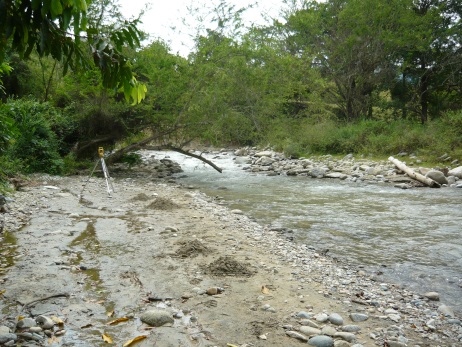 |  | -75.2505218 | 4.447296363 |
| **Luisa River** | Bocatoma  Enerlim | L1 |  | |  | | --- | | -75.25222493 | 4.251432888 |
| **Luisa River** | Garganta I | L2 |  |  | -75.24306746 | 4.251416123 |
| **Luisa River** | Garganta II | L3 | 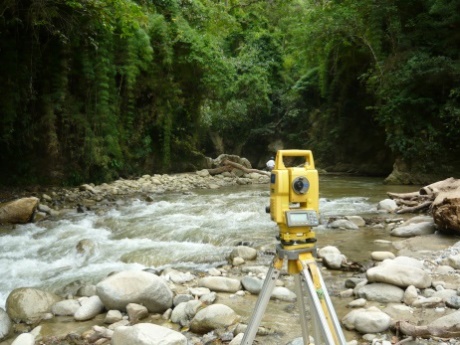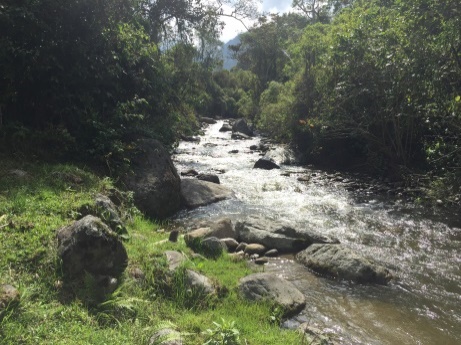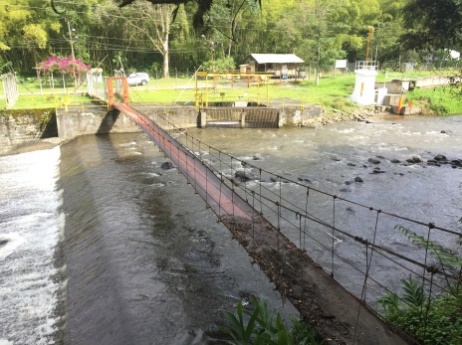 |  | -75.24285242 | 4.24980116 |
| **Quindío River** | Escobal | Q1 |  | |  | | --- | | -75.53086111 | 4.637888889 |
| **Quindío River** | Escobal | Q2 |  |  | -75.59427778 | 4.628444444 |
| **Quindío River** | Escobal | Q3 | 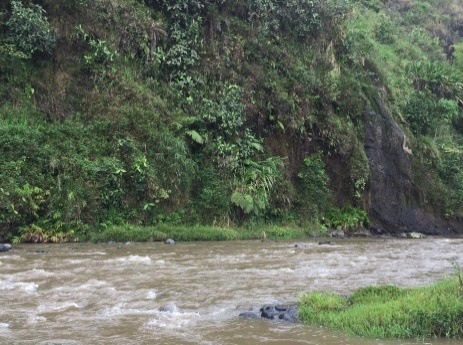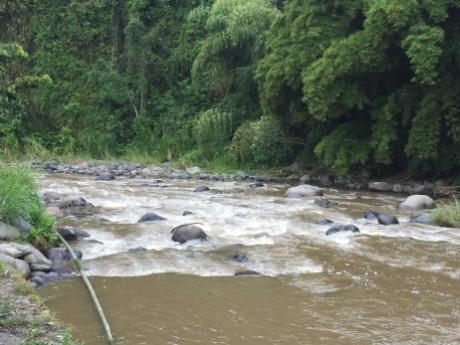 | | -75.65781147 | 4.539515402 |
| **Quindío River** | Escobal | Q4 |  |  | -75.6622981 | 4.5335166 |
